# Supplementary material for: Photolysis of the herbicide dicamba in aqueous solutions and on corn (Zea mays) epicuticular waxes
Source: Royal Society of Chemistry journal article supplement (doi:10.1039/d1em00058f), 2021-01-01
Supplement: d1em00058f1.pdf [file d1em00058f1.pdf]

**Photolysis of the Herbicide Dicamba in Aqueous Solutions and on Corn Surfaces:**  
**Supporting Information**

Kaitlyn Gruber

Brittany Courteau<sup>+</sup>

Maheemah Bokhoree

Jenna Kotz

Elijah McMahon

Amanda Nienow\*

Gustavus Adolphus College

800 W College Avenue

St. Peter, Minnesota 56082, United States

February 1, 2021

Submitted to Environmental Science: Processes and Impact

<sup>+</sup> Present Address: Department of Chemistry, Iowa State University, 1605 Gilman Hall, Ames, IA 50011

\*Author to whom correspondence should be addressed: Telephone: (507) 933-7327, fax: (507) 933-7041, Email: [anienow@gustavus.edu](mailto:anienow@gustavus.edu).

## Table of Contents

|                                                          |         |
|----------------------------------------------------------|---------|
| <u>Section 1:</u> Kinetic Plots for Aqueous Experiments  | Page 3  |
| <u>Section 2:</u> UV-Vis spectra and Irradiance plots    | Page 13 |
| <u>Section 3:</u> Micelle Formation                      | Page 16 |
| <u>Section 4:</u> Chromatogram from LC-MS                | Page 17 |
| <u>Section 5:</u> Computational Data about Photoproducts | Page 18 |

### Section 1:

First order kinetics plots for all rate constants. All plots show the natural log of dicamba concentration versus irradiation time in minutes. The data points are from the experiment described in the figure captions and the lines are the weighted linear regression used to obtain the rate constant,  $k$ .

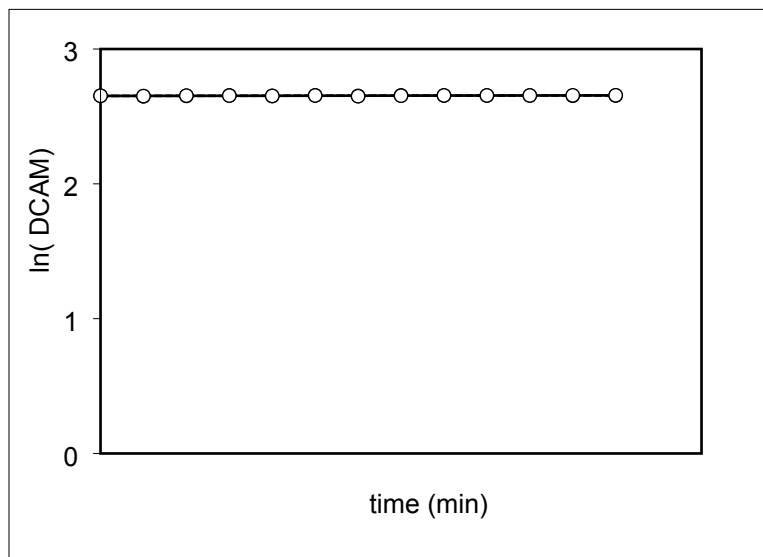

Figure S-1: Dark control – No irradiation of 15 mg/L dicamba solution. No reaction.

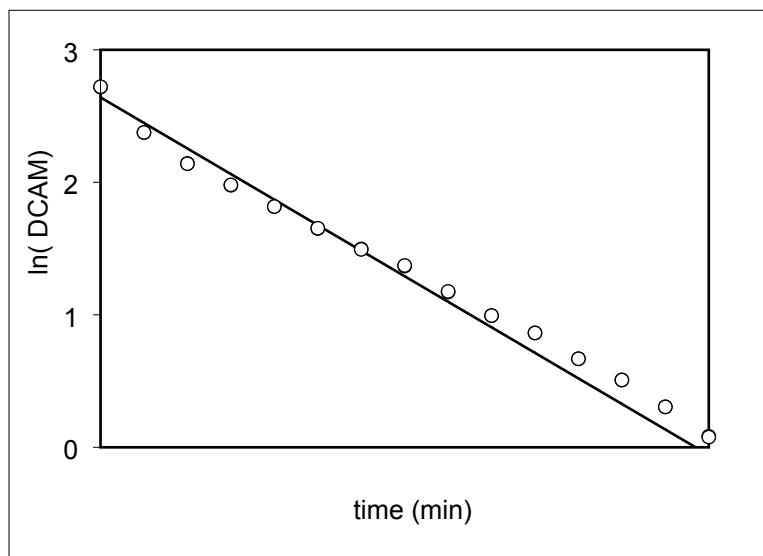

Figure S-2: Irradiation of 15 mg/L dicamba at pH 7 at 254 nm.  $k = 0.0386 \text{ min}^{-1}$ . Line is the weighted linear regression line.

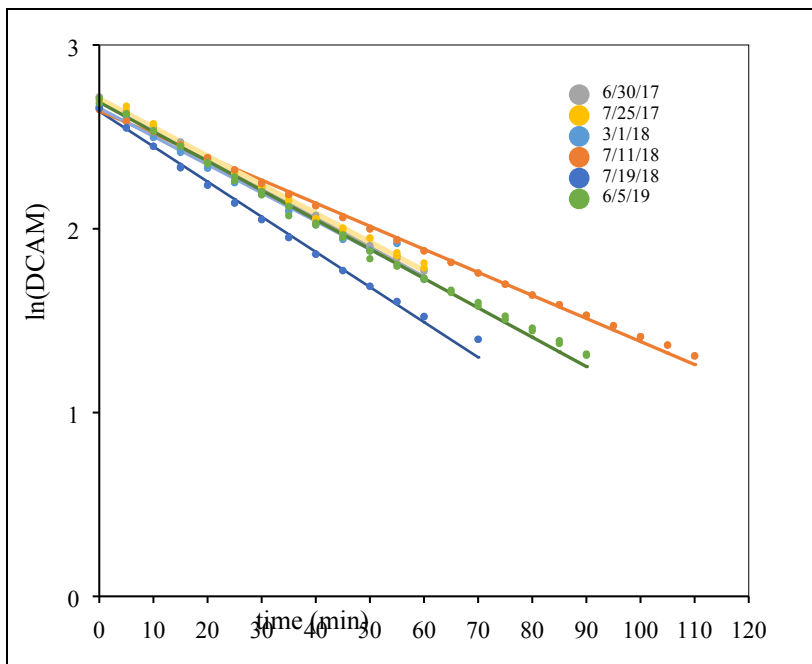

Figure S-3: Irradiation of 15 mg/L dicamba at pH 7 at 310 nm. All lines are weighted linear regression lines. Dates of experiments in legend (gray = 6/30/2017, yellow = 7/25/2017, light blue = 3/1/2018, orange = 7/11/2018, dark blue = 7/19/2018, and green = 6/5/2019). Average  $k=0.016 \pm 0.002 \text{ min}^{-1}$ .

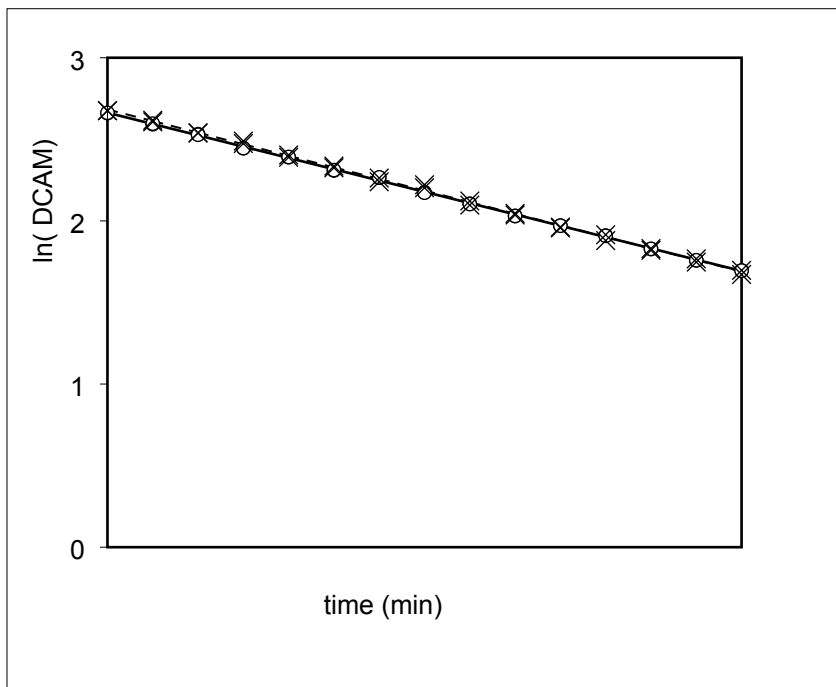

Figure S-4: Irradiation of 15 mg/L dicamba at pH 1 at 310 nm. Two experiments with average  $k = 0.014 \pm 0.002 \text{ min}^{-1}$ . X data points and dashed linear regression line from experiment on 7-10-2017 and circle data points and solid linear regression line from experiment on 6-20-2018.

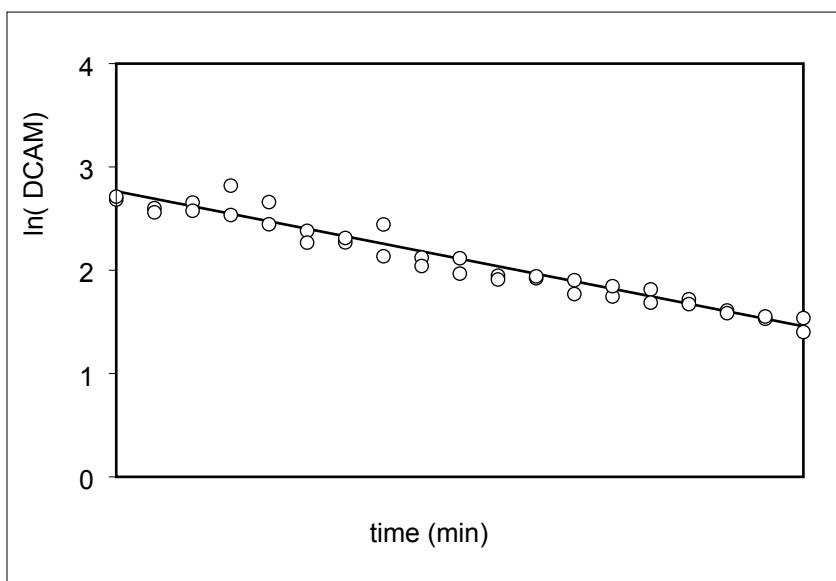

Figure S-5: Irradiation of 15 mg/L dicamba at pH 7 in oxygen saturated solution at 310 nm.  $k = 0.015 \pm 0.001 \text{ min}^{-1}$ .

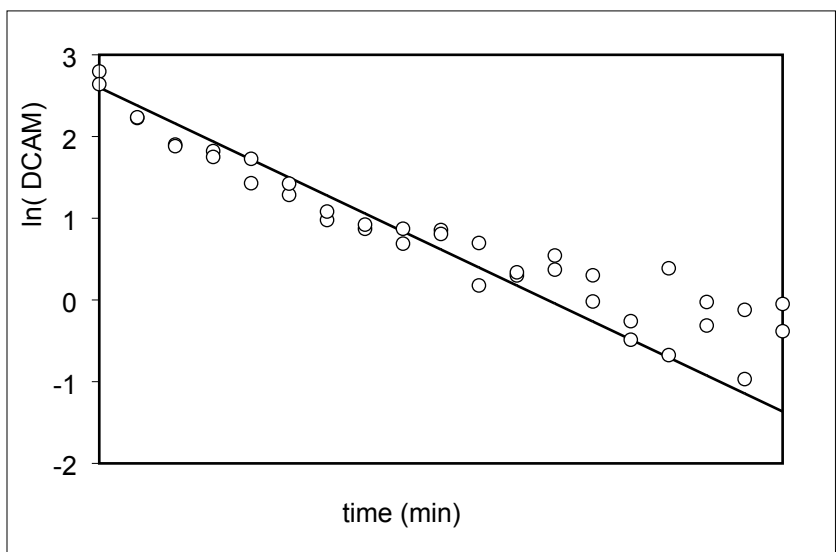

Figure S-6: Irradiation of 15 mg/L dicamba at pH 7 in nitrogen saturated solution at 310 nm.  $k = 0.044 \pm 0.003 \text{ min}^{-1}$ .

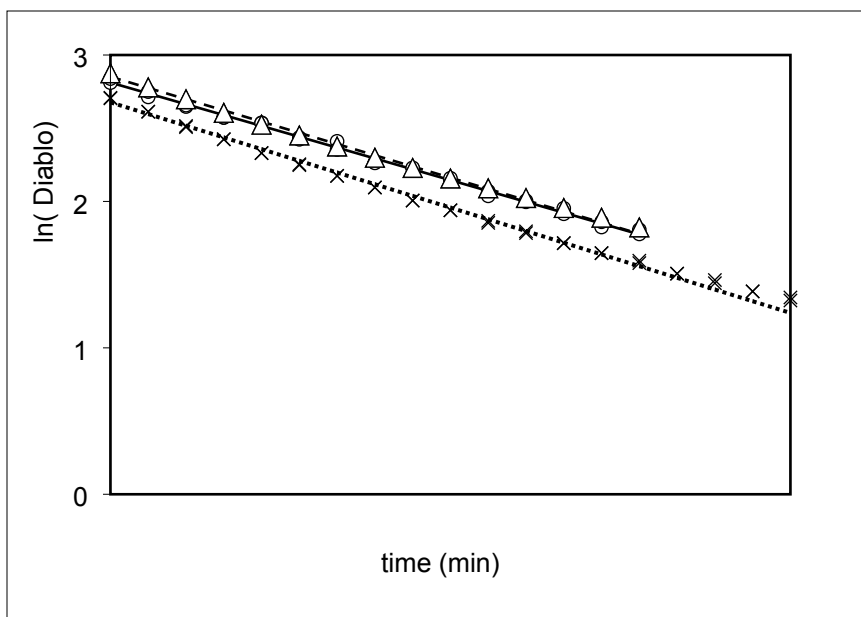

Figure S-7: Irradiation of 15 mg/L dicamba in commercial product Diablo at 310 nm. Three experiments with average  $k = 0.015 \pm 0.001 \text{ min}^{-1}$ . Circle data points and solid linear regression line from experiment on 8-10-2017, triangle data points and dashed linear regression line from experiment on 6-21-2018, and X data points and dotted regression line from experiment on 6-30-2020. Note that the initial concentration in 2020 was slightly lower, shifting the data points lower, but the slope is still the same as the other two experiments.

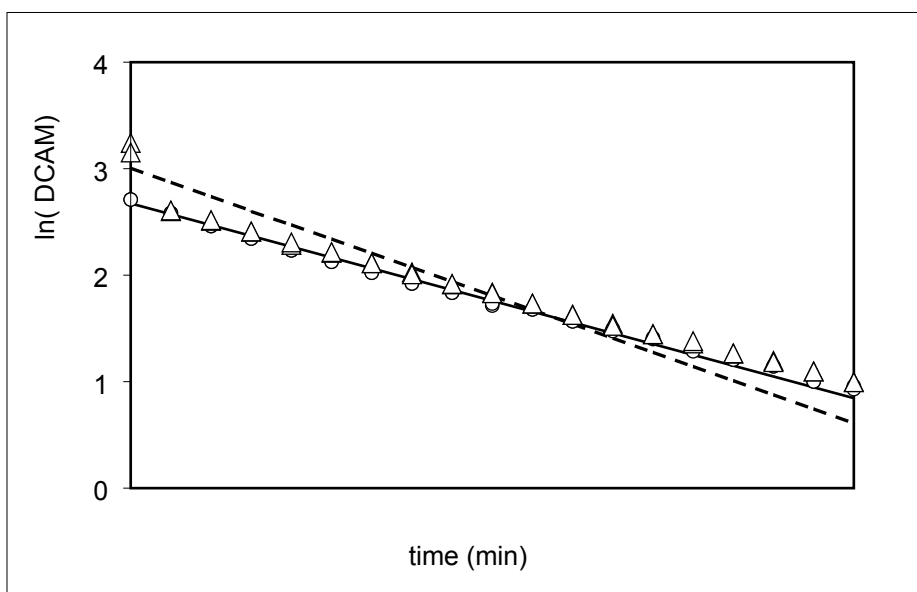

Figure S-8: Irradiation of 15 mg/L dicamba at pH 7 with 5 mg/L DA-6 adjuvant at 310 nm. Two experiments with average  $k = 0.023 \pm 0.004 \text{ min}^{-1}$ . X data points and dashed linear regression line from experiment on 6-26-2019 and circle data points and solid linear regression line from experiment on 6-30-2020.

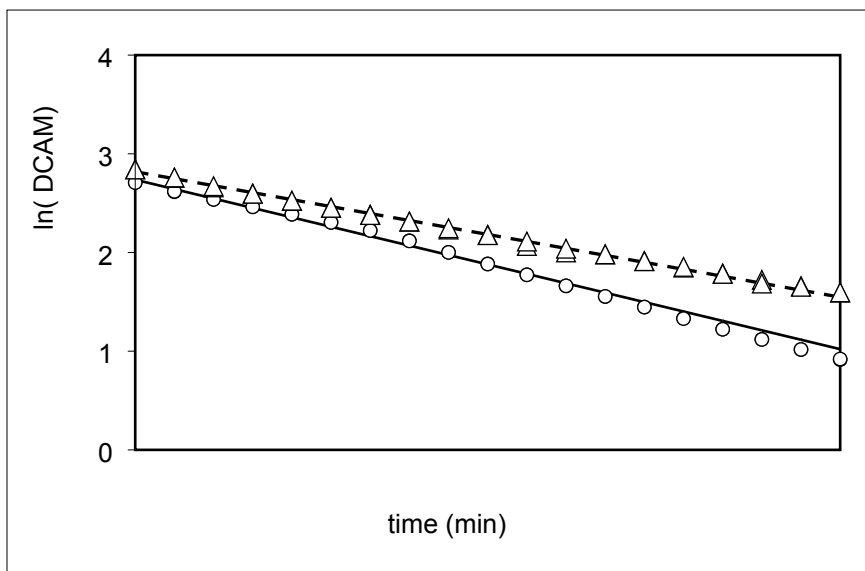

Figure S-9: Irradiation of 15 mg/L dicamba at pH 7 with 5 mg/L DA-6 adjuvant with 1% isopropanol as a hydroxyl radical quencher at 310 nm. Two experiments with average  $k = 0.017 \pm 0.004 \text{ min}^{-1}$ . Circle data points and solid linear regression line from experiment on 6-30-2020 and triangle data points and dashed linear regression line from experiment on 7-12-2019.

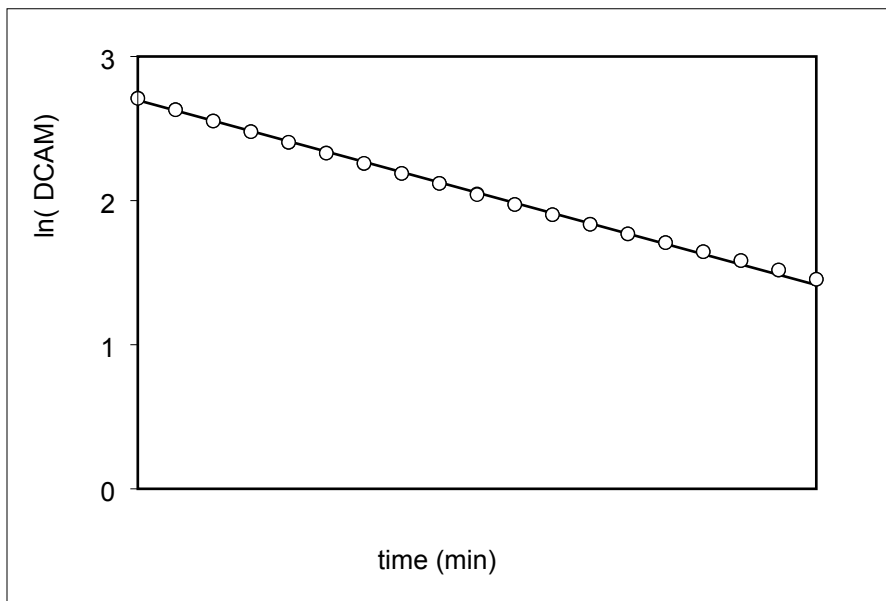

Figure S-10: Irradiation of 15 mg/L dicamba at pH 7 with 5 mg/L DA-6 adjuvant with 5 mM L-histidine at 310 nm.  $k = 0.014 \pm 0.002 \text{ min}^{-1}$ .

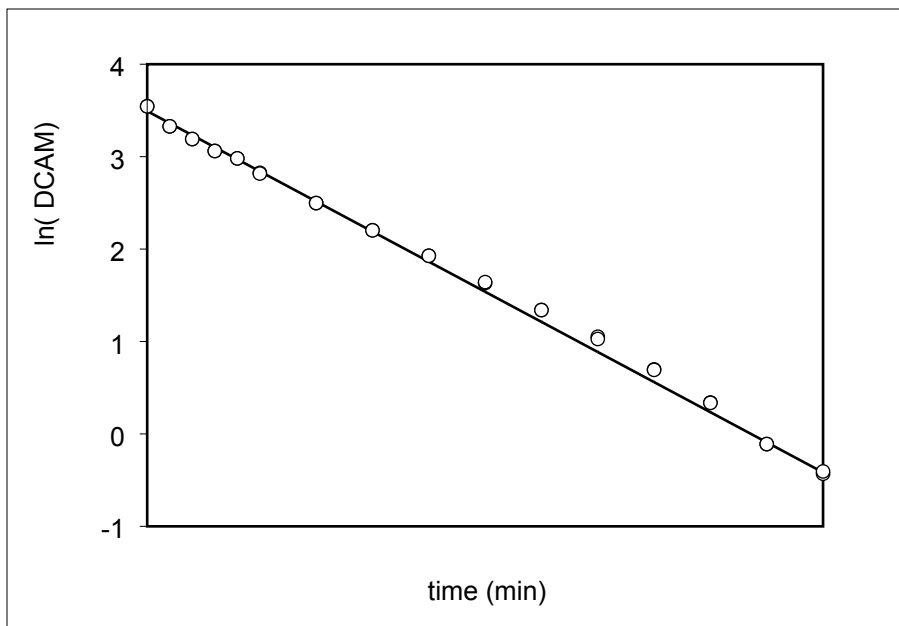

Figure S-11: Irradiation of 15 mg/L dicamba at pH 7 with 5 mM H<sub>2</sub>O<sub>2</sub> as hydroxyl radical source at 310 nm.  $k = 0.065 \pm 0.002 \text{ min}^{-1}$ .

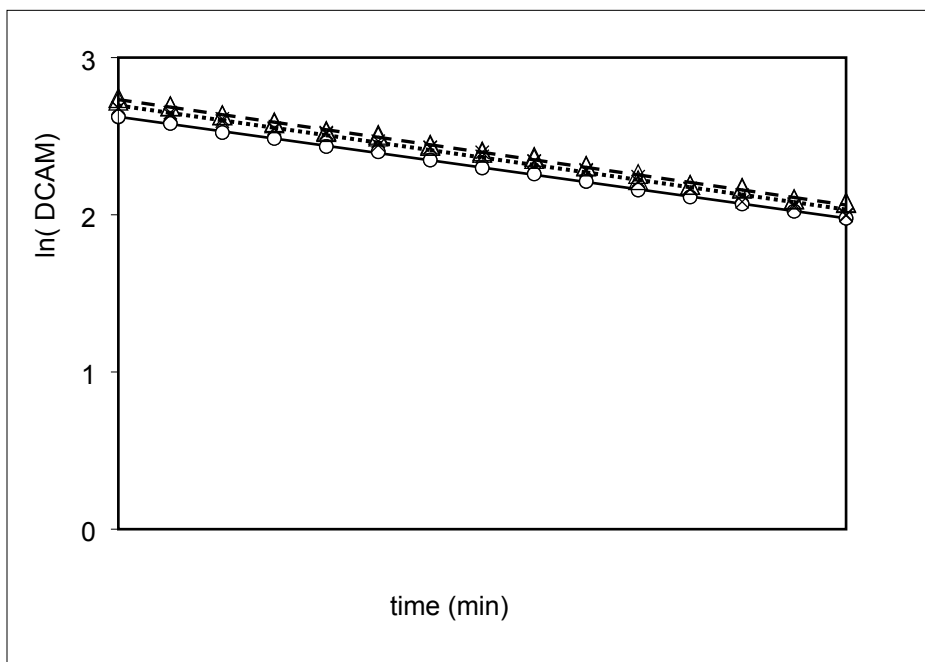

Figure S-12: Irradiation of 15 mg/L dicamba with 10 mg/L NOM at 310 nm. Three experiments with average  $k = 0.009 \pm 0.001 \text{ min}^{-1}$ . Circle data points and solid linear regression line from experiment on 4-18-2018, triangle data points and dashed linear regression line from experiment on 7-21-2017, and X data points and dotted regression line from experiment on 8-3-2017.



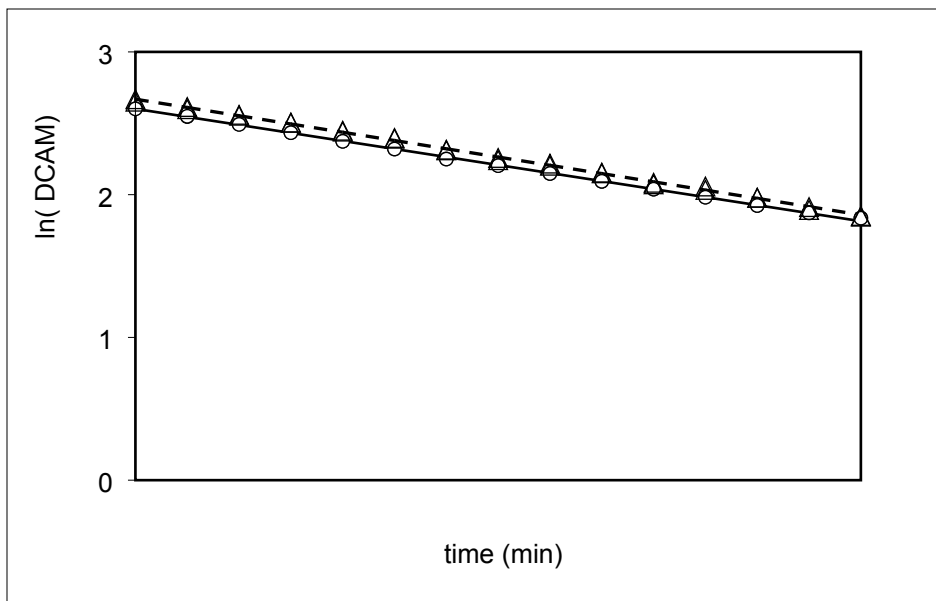

Figure S-13: Irradiation of 15 mg/L dicamba with 5.2 mg/L NOM at 310 nm. Two experiments with average  $k = 0.011 \pm 0.001 \text{ min}^{-1}$ . Circle data points and solid linear regression line from experiment on 4-18-2018, triangle data points and dashed linear regression line from experiment on 8-1-2017.

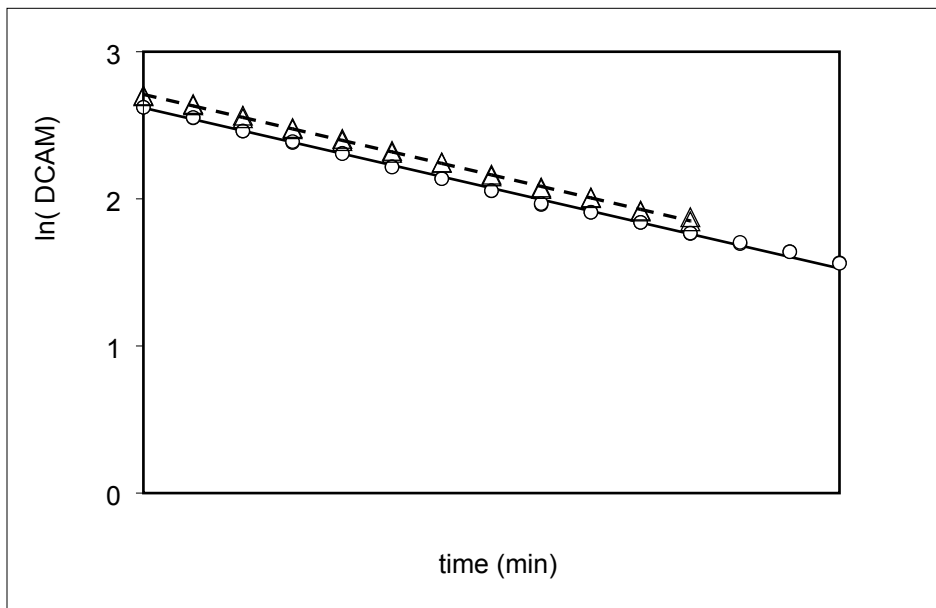

Figure S-14: Irradiation of 15 mg/L dicamba with 1.2 mg/L NOM at 310 nm. Two experiments with average  $k = 0.016 \pm 0.001 \text{ min}^{-1}$ . Circle data points and solid linear regression line from experiment on 4-18-2018, and triangle data points and dashed linear regression line from experiment on 8-2-2017.

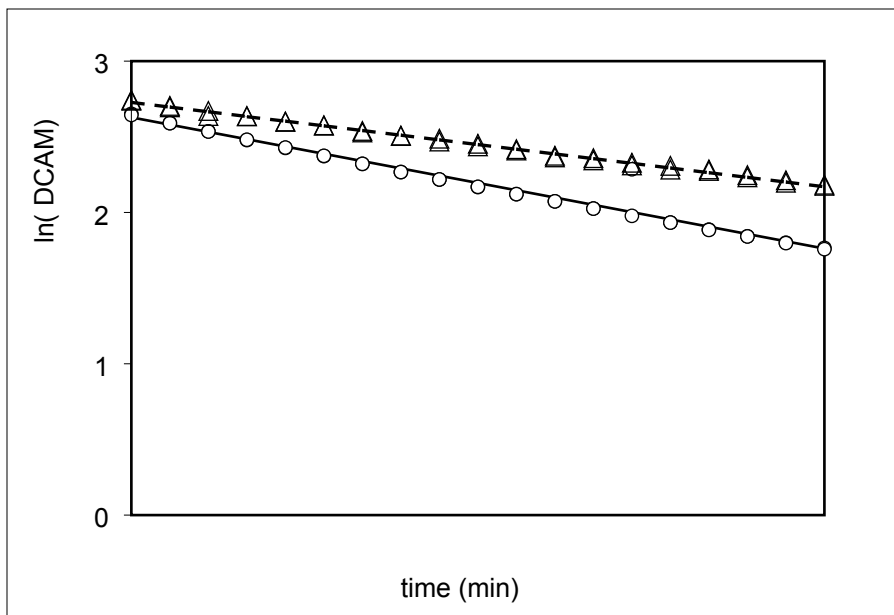

Figure S-15: Comparison of irradiation of 15 mg/L dicamba in Minnesota River water. Circle data points and solid linear regression from experiment on 6/22/2019, and triangles and dotted linear regression line from experiment on 6/22/2020.

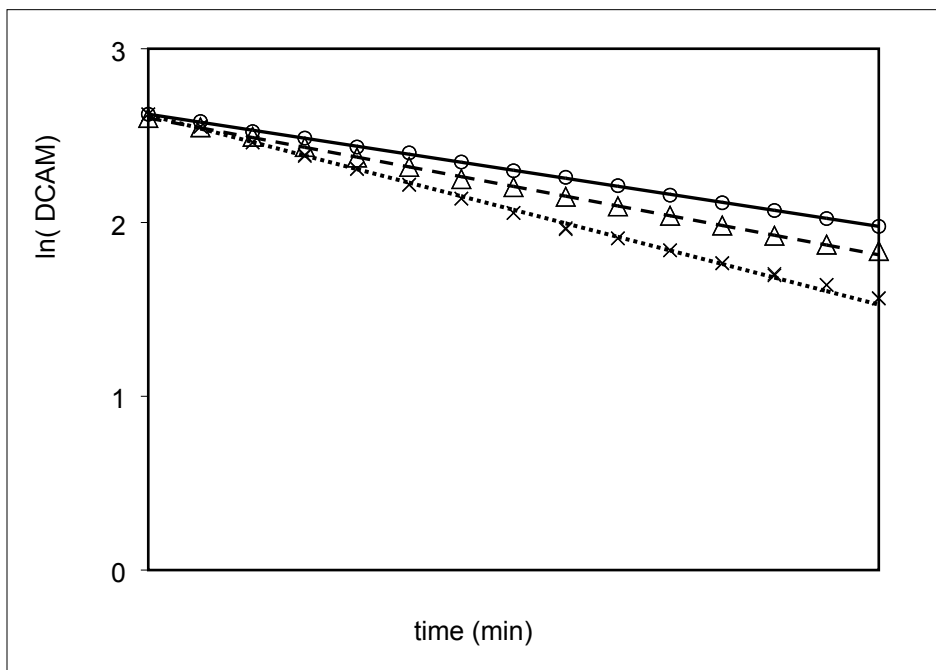

Figure S-16: Comparison of irradiation of 15 mg/L dicamba with 1.2 mg/L NOM (circles), 5.2 mg/L NOM (triangles), and 10.0 mg/L NOM (X). All lines are weighted linear regression lines. All data taken from 4-18 and 4-19-2018.

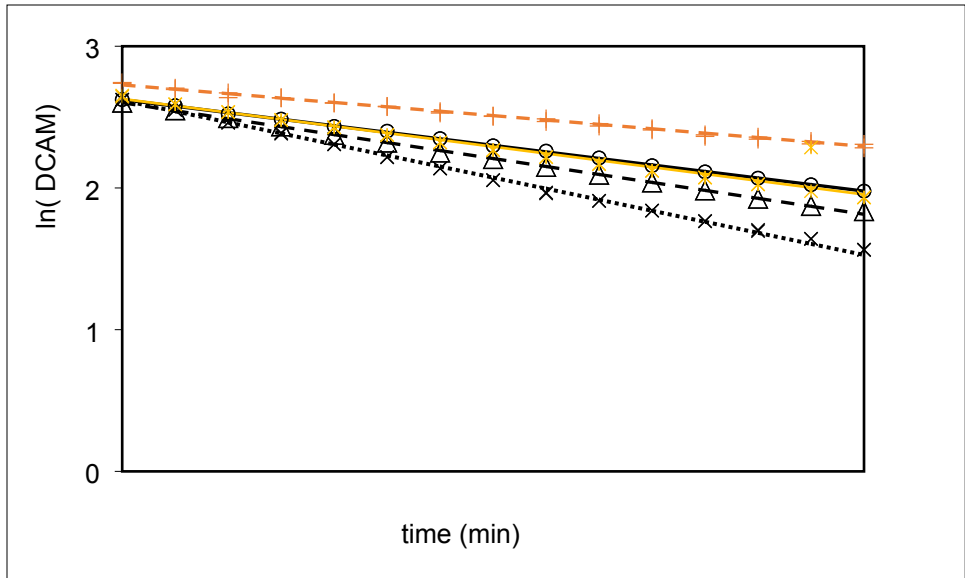

Figure S-17: Comparison of irradiation of 15 mg/L dicamba with 1.2 mg/L NOM (circles), 5.2 mg/L NOM (triangles), and 10.0 mg/L NOM (X). All lines are weighted linear regression lines. All data taken from 4-18 and 4-19-2018. Also overlaid is the data from irradiating 15 mg/L dicamba spiked into Minnesota River water (yellow = 2020 and orange = 2019).

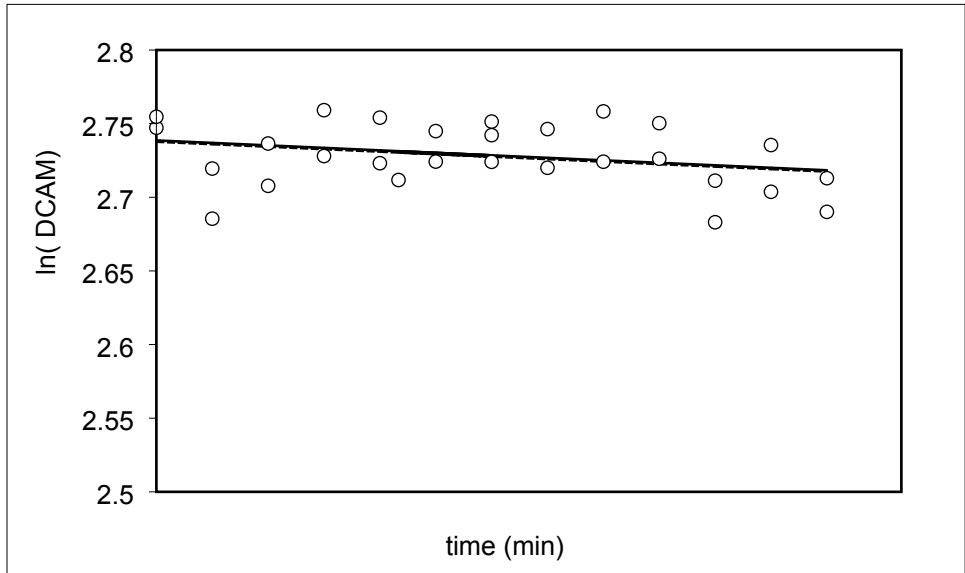

Figure S-18: Irradiation of 15 mg/L dicamba at pH 7 in St. Peter, MN on the Gustavus Adolphus College campus (44° 20' 0" N, 93° 58' 0" W) on June 12-13, 2019, from 11:10 am – 5:10 pm each day.  $k = 3 \times 10^{-5} \pm 2 \times 10^{-5} \text{ min}^{-1}$ .

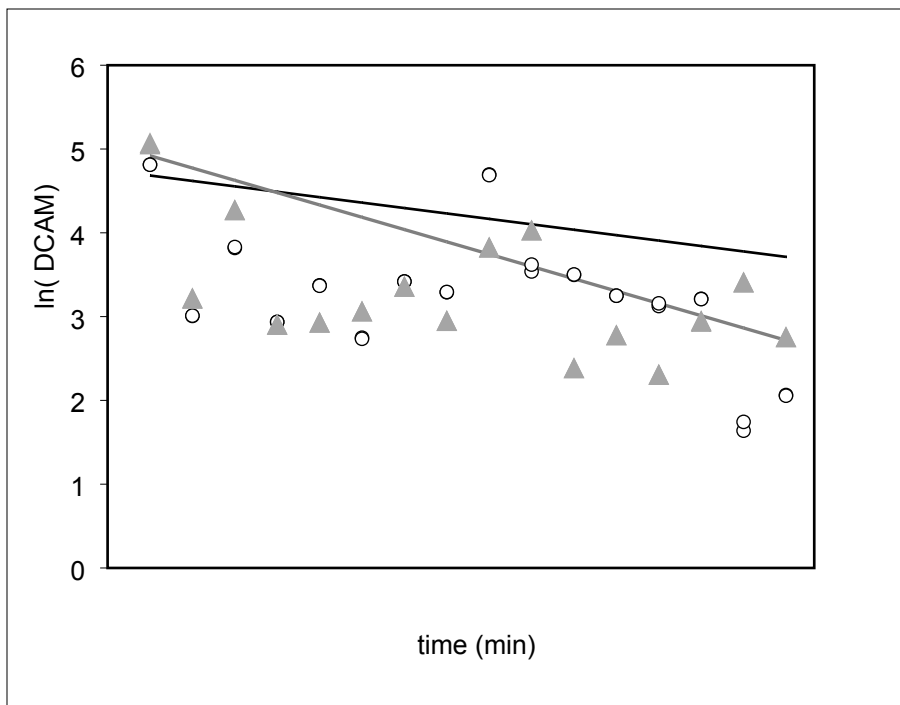

Figure S-19: Irradiation of 15 mg/L dicamba in aqueous solution at pH 7 in a Q-Sun solar simulator with Xe lamp and Daylight-Q filter. Two plates were irradiated simultaneously giving two data sets (circles and triangles). The lines are the weighted linear regression fits to the two data sets. The average rate constant is  $k = 9 \times 10^{-4} \pm 5 \times 10^{-4} \text{ min}^{-1}$ .

## Section 2:

### UV-Vis spectra and Irradiance plots

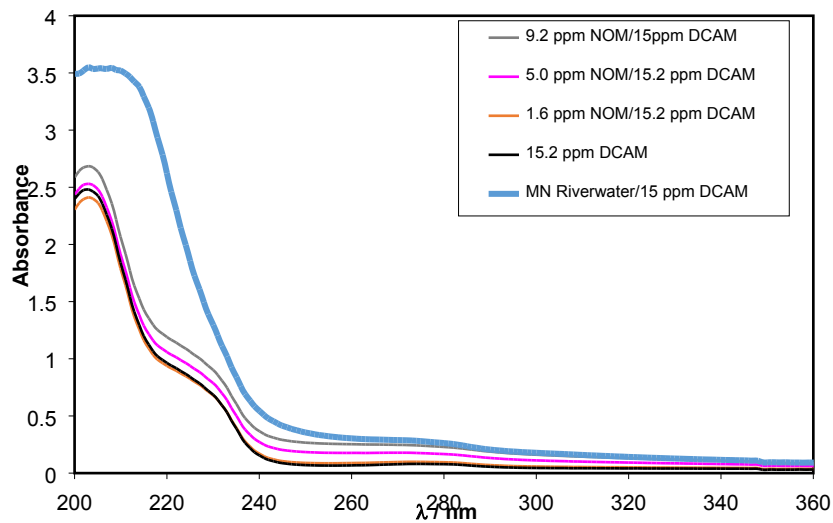

Figure S-20: UV-Vis spectra of 15.2 ppm dicamba in a) pH 7 phosphate buffer (black), b) pH 7 phosphate buffer with 1.6 mg/L NOM (green), c) pH 7 phosphate buffer with 5.0 mg/L NOM (pink), d) pH 7 phosphate buffer with 9.2 mg/L NOM (dark blue), and e) MN River water collected in 2019 (light blue).

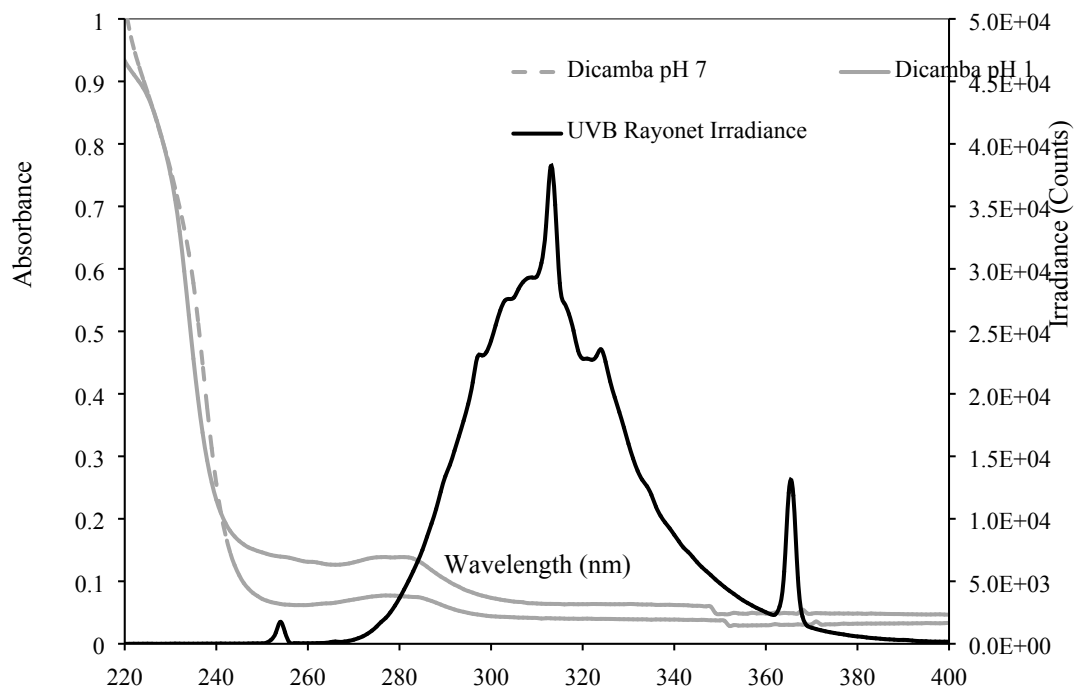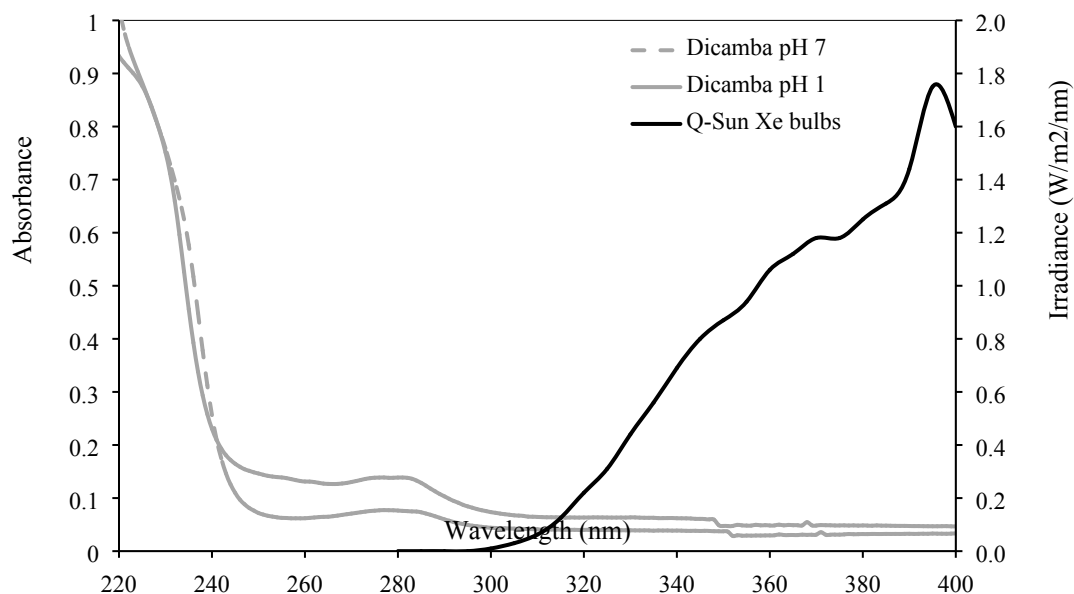

Figure S-21: (A) Absorbance spectra of 15 ppm dicamba buffered at pH 7 (dashed line) and pH 1 (solid line) and the irradiance spectrum of the Rayonet 310 nm bulbs used for all aqueous experiments. (B) Absorbance spectra of 15 ppm dicamba buffered at pH 7 (dashed line) and pH 1 (solid line) and the irradiance spectrum of the Q-sun Xenon lamps with daylight filter used for all wax experiments. Both the Rayonet and Q-sun spectra are estimated from product brochures.

Table S-1: Molar Extinction Coefficients for dicamba in solutions at pH 7 and pH 1

| Dicamba          | pH 7                            | pH 1                            | Dicamba          | pH 7                            | pH 1                            |
|------------------|---------------------------------|---------------------------------|------------------|---------------------------------|---------------------------------|
| Wavelength<br>nm | Molar<br>Extinction<br>1/(M cm) | Molar<br>Extinction<br>1/(M cm) | Wavelength<br>nm | Molar<br>Extinction<br>1/(M cm) | Molar<br>Extinction<br>1/(M cm) |
| 270              | 896.8                           | 1313.6                          | 310              | 340.8                           | 368.8                           |
| 271              | 874.7                           | 1339.9                          | 311              | 337.9                           | 360.9                           |
| 272              | 866.3                           | 1367.2                          | 312              | 332.0                           | 355.8                           |
| 273              | 871.5                           | 1399.6                          | 313              | 328.7                           | 350.7                           |
| 274              | 864.6                           | 1424.1                          | 314              | 322.6                           | 345.8                           |
| 275              | 858.7                           | 1442.8                          | 315              | 312.1                           | 337.4                           |
| 276              | 847.2                           | 1445.5                          | 316              | 311.7                           | 338.5                           |
| 277              | 840.6                           | 1444.7                          | 317              | 305.8                           | 334.7                           |
| 278              | 833.9                           | 1442.2                          | 318              | 297.9                           | 328.6                           |
| 279              | 824.3                           | 1442.2                          | 319              | 290.8                           | 324.2                           |
| 280              | 816.7                           | 1441.8                          | 320              | 283.7                           | 323.3                           |
| 281              | 812.8                           | 1446.4                          | 321              | 281.5                           | 322.1                           |
| 282              | 800.7                           | 1449.3                          | 322              | 274.1                           | 317.9                           |
| 283              | 781.6                           | 1437.1                          | 323              | 267.5                           | 312.4                           |
| 284              | 750.8                           | 1404.5                          | 324              | 262.3                           | 311.7                           |
| 285              | 700.9                           | 1331.2                          | 325              | 262.5                           | 314.6                           |
| 286              | 658.4                           | 1255.8                          | 326              | 259.3                           | 315.1                           |
| 287              | 619.6                           | 1177.3                          | 327              | 255.8                           | 312.0                           |
| 288              | 587.0                           | 1109.4                          | 328              | 255.9                           | 313.7                           |
| 289              | 545.0                           | 1019.0                          | 329              | 249.6                           | 312.4                           |
| 290              | 509.4                           | 942.2                           | 330              | 245.8                           | 309.6                           |
| 291              | 484.8                           | 876.4                           | 331              | 247.3                           | 310.1                           |
| 292              | 468.7                           | 829.3                           | 332              | 246.2                           | 311.1                           |
| 293              | 448.6                           | 771.6                           | 333              | 241.7                           | 311.8                           |
| 294              | 425.0                           | 711.4                           | 334              | 246.2                           | 316.2                           |
| 295              | 409.3                           | 664.3                           | 335              | 248.2                           | 316.5                           |
| 296              | 399.6                           | 627.8                           | 336              | 245.8                           | 315.7                           |
| 297              | 387.9                           | 585.4                           | 337              | 245.8                           | 316.4                           |
| 298              | 383.6                           | 555.4                           | 338              | 245.6                           | 314.7                           |
| 299              | 380.3                           | 529.4                           | 339              | 244.7                           | 313.6                           |
| 300              | 373.4                           | 500.5                           | 340              | 245.9                           | 316.1                           |
| 301              | 369.6                           | 479.0                           | 341              | 245.5                           | 316.3                           |
| 302              | 366.7                           | 458.1                           | 342              | 244.0                           | 314.5                           |
| 303              | 365.5                           | 443.7                           | 343              | 246.8                           | 313.4                           |
| 304              | 360.4                           | 426.0                           | 344              | 245.7                           | 311.2                           |
| 305              | 357.3                           | 410.7                           | 345              | 244.0                           | 309.5                           |
| 306              | 354.2                           | 400.6                           | 346              | 246.8                           | 311.5                           |
| 307              | 352.6                           | 390.9                           | 347              | 248.7                           | 307.8                           |
| 308              | 348.7                           | 382.4                           | 348              | 247.4                           | 307.2                           |
| 309              | 344.1                           | 373.6                           | 349              | 248.2                           | 301.2                           |
|                  |                                 |                                 | 350              | 246.7                           | 300.0                           |





### Section 3: Micelle Formation

Using the methods from Ross and Olivier,<sup>1</sup> we tested for the formation of micelles by examining the UV-Vis spectra of iodine (40 ppm) in a series of DA-6 solutions in Milli-Q water ranging from 0.5 to 5000 ppm. At low concentrations of DA-6 (below 550 ppm), the UV-Vis spectra of the I<sub>2</sub>/DA-6 solutions were identical. At concentrations of DA-6 above 1000 ppm, the UV-Vis spectra showed higher absorbance and more structure between 250-400 nm (see Figure S\_22). This change in absorbance is evidence for the formation of micelles, suggesting that the cmc for DA-6 is above 550 ppm. This is in accordance with the estimated value of 400 ppm taken from Mukerjee and Mysels,<sup>2</sup> and supports the conclusion that no micelles are formed in the photolysis experiments presented in this paper. The conclusion is photosensitization observed with the DA-6 solutions is not caused from the change in environment present in solutions containing micelles.

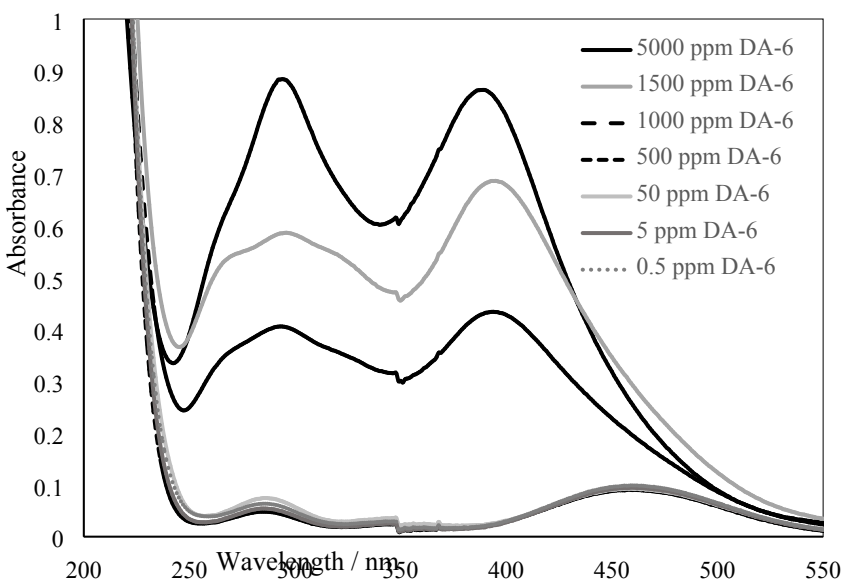

Figure S-22: UV-Vis spectra of 40 ppm I<sub>2</sub> (aq) with differing amounts of surfactant DA-6. At concentrations at 500 ppm or below, the UV-Vis spectra of I<sub>2</sub> (aq) are identical, but at 1000 ppm DA-6 or above, the spectra increase in intensity. This suggests the formation of micelles in solutions with concentrations above 1000 ppm DA-6. Photolysis experiments were conducted at 5 ppm DA-6 which is well below the critical micelle concentration.

#### References

- 1S. Ross and J. P. Olivier, *The Journal of Physical Chemistry*, 1959, **63**, 1671–1674.
- 2P. Mukerjee and K. Mysels, *Critical Micelle Concentrations of Aqueous Surfactant Systems*, Office of Standard Reference Data, National Bureau of Standards, 1971.

Section 4:  
Chromatogram from LC-MS

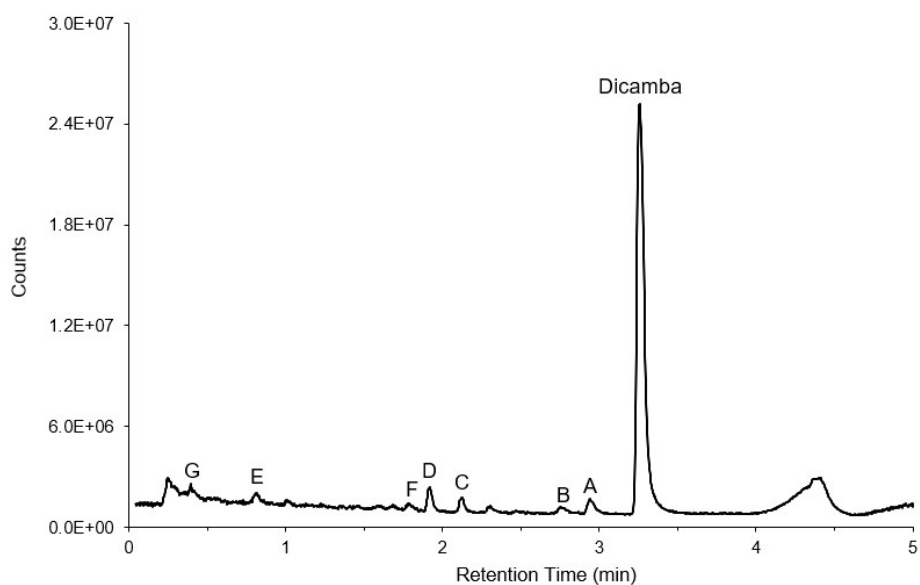

Figure S-23: LC-MS chromatogram obtained after 35 min of irradiation of 15.2 ppm dicamba with 310 nm light. The labels correspond to the photoproducts presented in Table 4. Because photoproduct G is so close to the solvent front, it was not explored further.

## Section 5: Computational Data:

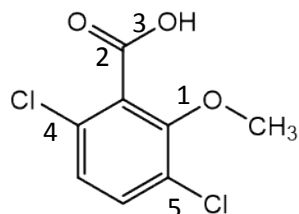

Table S-2: Bond lengths obtained from B3LYP/6-311G+(2d,p) calculations for dicamba in the ground (singlet) and excited (triplet) states. The most significant changes are reported.

| Bond | Bond Length in Singlet State (Å) | Bond length in Triplet State (Å) | Difference (Å) |
|------|----------------------------------|----------------------------------|----------------|
| 1    | 1.50                             | 1.36                             | -0.14          |
| 2    | 1.50                             | 1.39                             | -0.11          |
| 3    | 1.05                             | 0.98                             | -0.07          |
| 4    | 1.76                             | 1.82                             | 0.06           |
| 5    | 1.76                             | 1.83                             | 0.07           |

Table S-3: Energies of possible structures of photoproducts B, C and D

| Photoproduct | Enthalpy of Formation (Hartree) |
|--------------|---------------------------------|
| B1           | -1030.956771                    |
| B2           | -1030.957517                    |
| C1           | -1529.841444                    |
| C2           | -1529.841286                    |
| D1           | -1070.215545                    |
| D2           | -1070.217382                    |
